# Supplementary material for: DNA methylation programming and reprogramming in primate embryonic stem cells
Source: HighWire-hosted journal article supplement (doi:10.1101/gr.096685.109), 2009-11-03
Supplement: SupMaterial.pdf [file SupMaterial.pdf]

## SUPPLEMENTAL FIGURES LEGEND

**Fig S1: Biological replicates. A) Correlation of biological replicates.** Scatter plots depicting the correlation between normalized methylation values of two biological replicates for each cell line. **B) methylation in *HOXA* cluster of biological replicates.** Shown are the methylation profiles at the *HOXA* cluster for individual arrays. For forming the averaged profile, the Fib.\_2 and Cres2\_2 arrays were not used. For DMR screening we used all data as is.

**Fig S2: Differential methylation distributions. A)** The distribution of the difference in methylation between ORMES-22 and fibroblasts in hyper-DMRs **B)** The distribution of the difference in methylation between ORMES-22 and fibroblasts in hypo-DMRs.

**Fig S3: Sequence analysis of hypo- and hyper- DMRs at low CpG levels. A) dinucleotide distribution.** The frequency of dinucleotides was computed for hypo-DMRs (green), hyper-DMRs (red) and background regions (grey) with average CpG content less than 15. Background regions were chosen as regions in which the difference between ORMES-22, fibroblasts and CRES-2 was insignificant (KS p-value > 0.001). **B) CpG sequence context.** Shown are the frequency profiles for dinucleotides following a CpG in hypo-DMRs (green), hyper-DMRs (red) and background regions (grey) in which the average CpG content is less than 15.

**Fig S4: Sequence analysis of hypo- and hyper- DMRs at intermediate CpG levels. A) dinucleotide distribution. B) CpG sequence context.** As Fig S3, for average CpG content between 15 and 40.

**Fig S5: DMRs at regulated promoters.** Induced and repressed genes (here at least two fold) were extracted using gene expression array profiles on fibroblasts, ORMES-22 and CRES-2. Individual tiling array probes were classified as hyper-methylated and hypo-methylated according to their fibroblast and ORMES-22 array values (normalized array difference > 0.6), and were further partitioned according to their CpG content (low: CpG < 15, intermediate: 15 < CpG < 50, high CpG > 50). We computed the number of probes at each distance relative to induced (upper) and repressed (lower) TSSs. The log<sub>2</sub> of the ratio between this number and the number expected by chance (assuming hyper- and hypo- methylated probes are randomly

distributed) is plotted. As expected from the general anti-correlation between gene expression and DNA methylation, induced genes are enriched with hypo-methylated probes and anti-enriched for hyper-methylated probes, while repressed genes are enriched with hyper-methylated probes.

**Fig S6: Occupancy of pluripotency factors. A) Oct4 occupancy.** Shown are box plots for average human Oct4 occupancy on mapped monkey DMRs and background regions. We plot separately groups of regions with different levels of CpG content, dissected into groups of hyper-DMRs (red), hypo-DMRs (green), regions with low ES methylation (blue) and regions with high ES methylation (yellow). **B) Nanog occupancy.** As part A, for Nanog.

**Fig S7: Properties of low reprogramming ratio DMRs. A) Reprogrammed DMR size distribution.** Shown is the log size distribution of genomic intervals determined to be hypo-DMRs with reprogramming ratio less than 0.25 (limited, blue), and hypo-DMRs with reprogramming ratio greater than 0.5 (extensive, black). **B) Reprogrammed DMR CpG content.** The average number of CpGs in 500 bp windows was computed for each DMR (each CpG was counted twice) and the distribution of CpG content for limited-reprogramming hypo-DMRs and extensive-reprogramming hypo-DMRs was plotted. **C) Reprogrammed DMRs Suz12 occupancy.** Shown is the distribution of Suz12 occupancy in human ESCs on mapped monkey hypo-DMRs with limited reprogramming (blue) and in hypo-DMRs with extensive reprogramming (black). **D) Reprogrammed DMR CTCF occupancy.** Shown is the distribution of CTCF occupancy in human fibroblasts on mapped monkey hypo-DMRs with limited reprogramming (blue) and in hypo-DMRs with extensive reprogramming (black). **E) Reprogrammed DMR telomere distance distribution.** The distance from telomere was computed for each DMR and the distributions of telomere distance of limited reprogrammed hypo-DMRs and extensively reprogrammed hypo-DMRs were plotted.

**Fig S8: CpG content vs. array binding ratio for all MeDIP samples.** Shown are the means of MeDIP binding ratios for every biological replicate and cell line, computed for bins of weighted probes' CpG contents, (hyb\_e curves, see Methods, Gal-Yam, Egger et al. 2008) and different G and C contents.

**Fig S9: qPCR validation.** Q-PCR amplification of genomic DNA fragments was purified by pull-down with anti-5 methylcytosine antibody. Paternally methylated *H19*

and maternally methylated *SNRPN* promoters were used as control genes. Enrichment of *H19* (black column) and *SNRPN* (blue column) was observed in IVF-derived ES cells, SCNT-derived ES cells and donor fibroblasts, consistent with CpG methylation on both the paternal and maternal alleles in these XY cells. As expected, enrichment of *H19* was observed in sperm and enrichment of *SNRPN* was observed in homozygous parthenogenetic ES cells. Enrichment values were plotted after normalization with 10% input DNA. Data represents the mean  $\pm$  S.E.M. (n = 4).

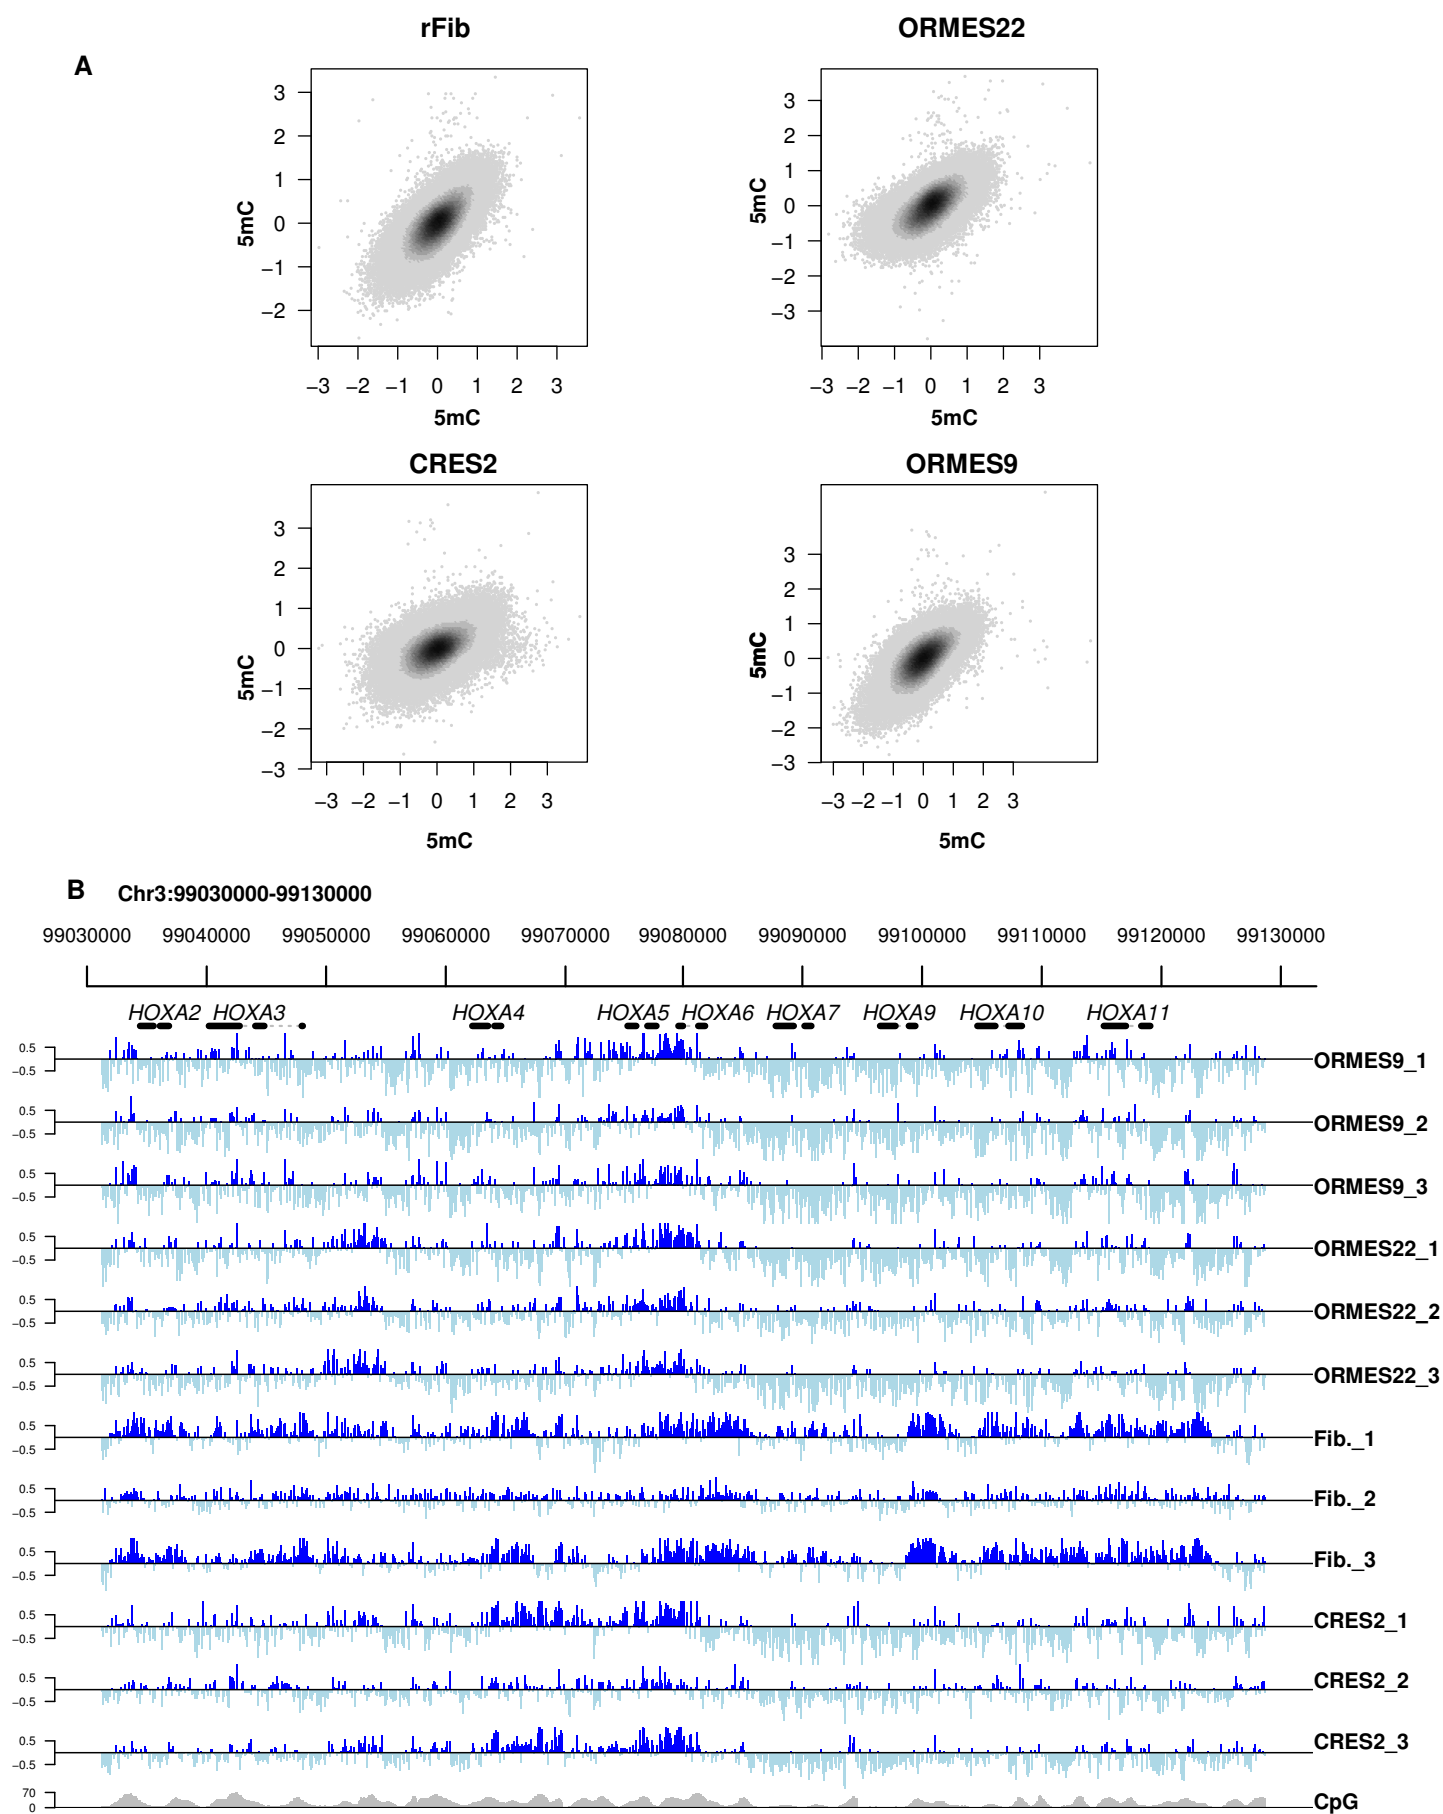

Figure S1

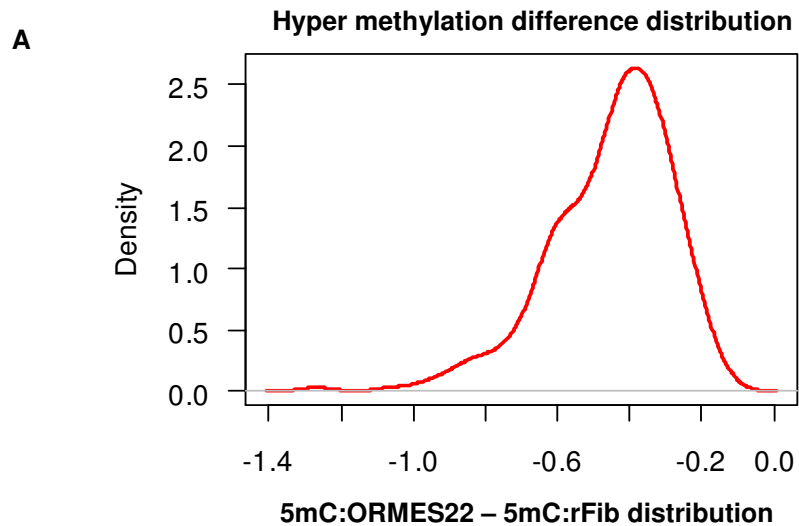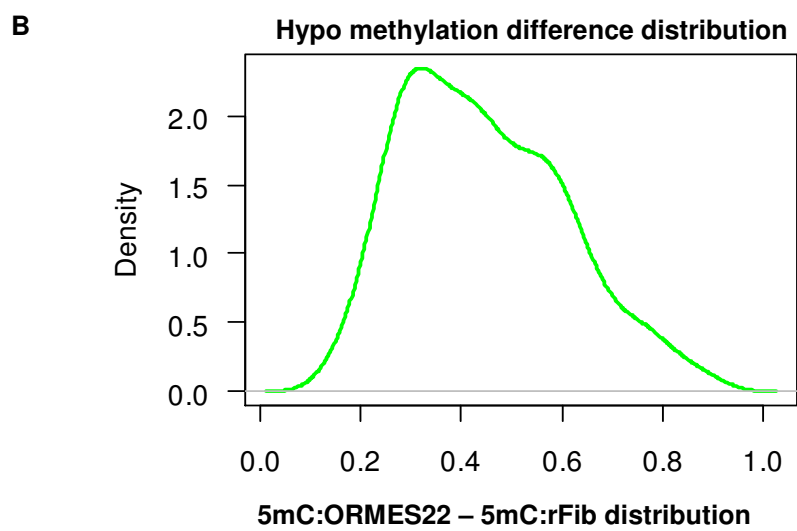

**Figure S2**

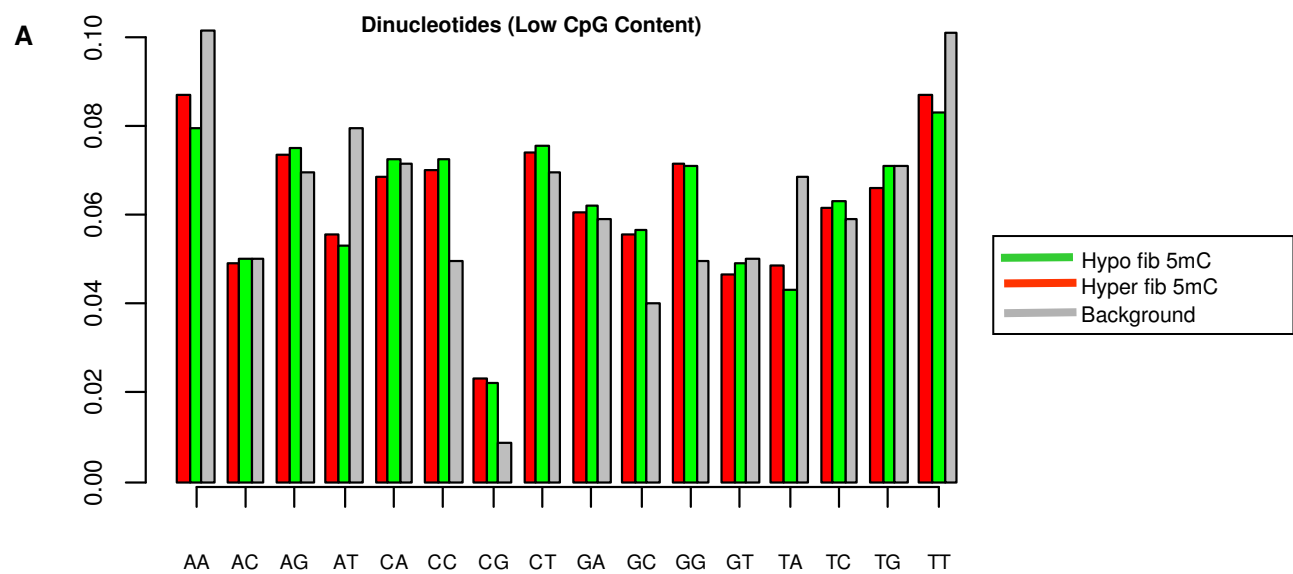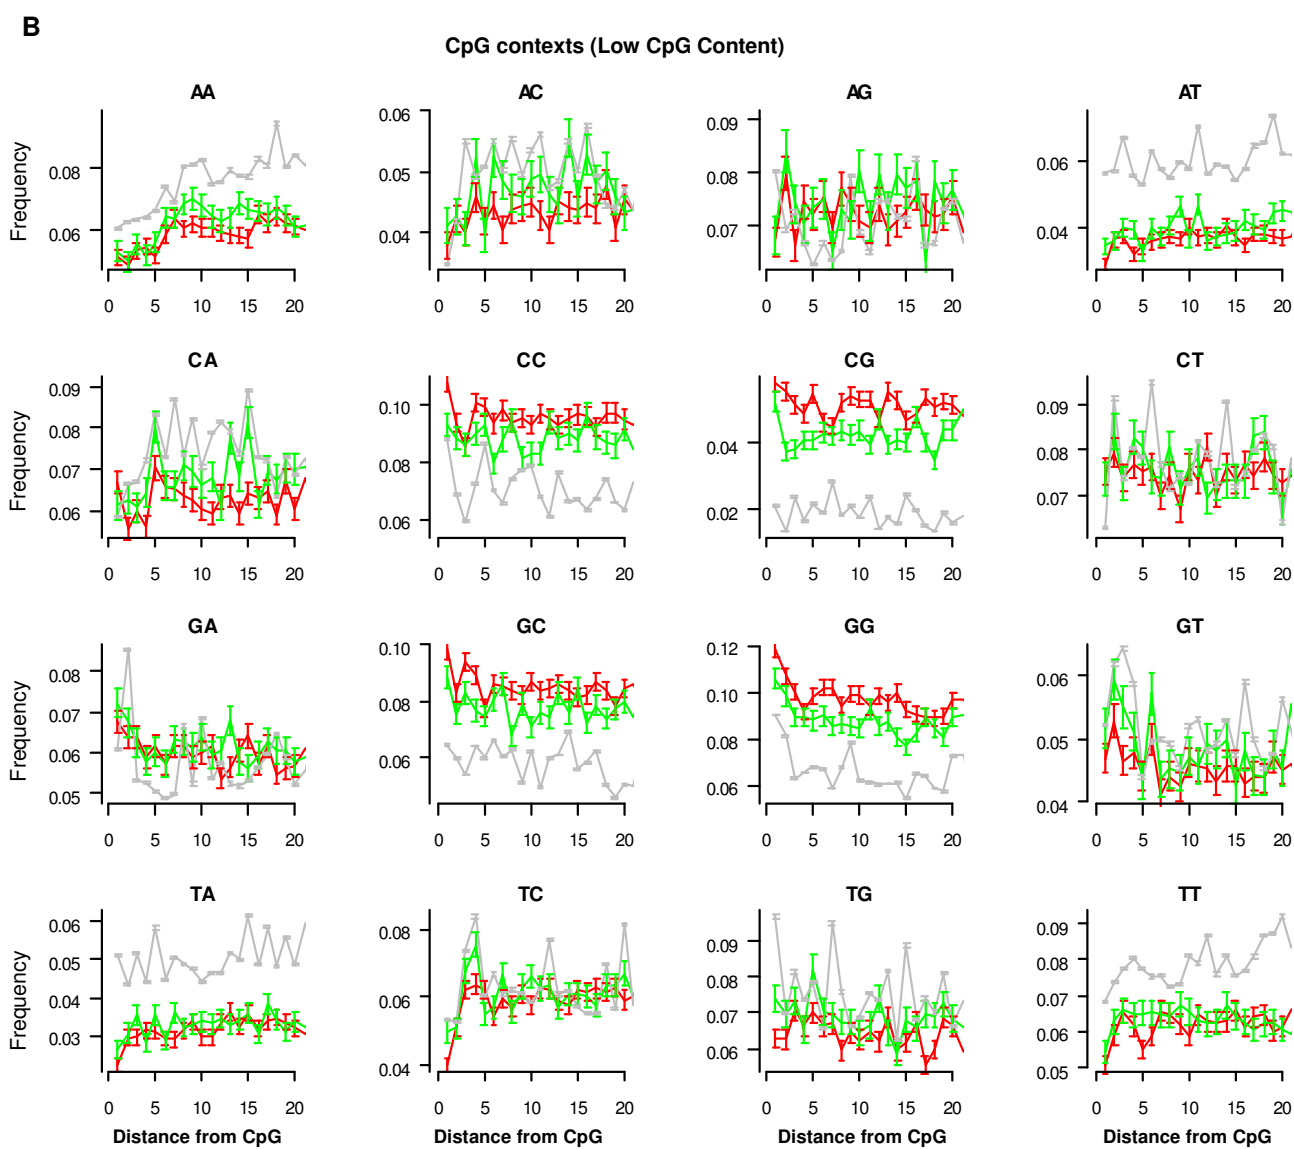

**Figure S3**

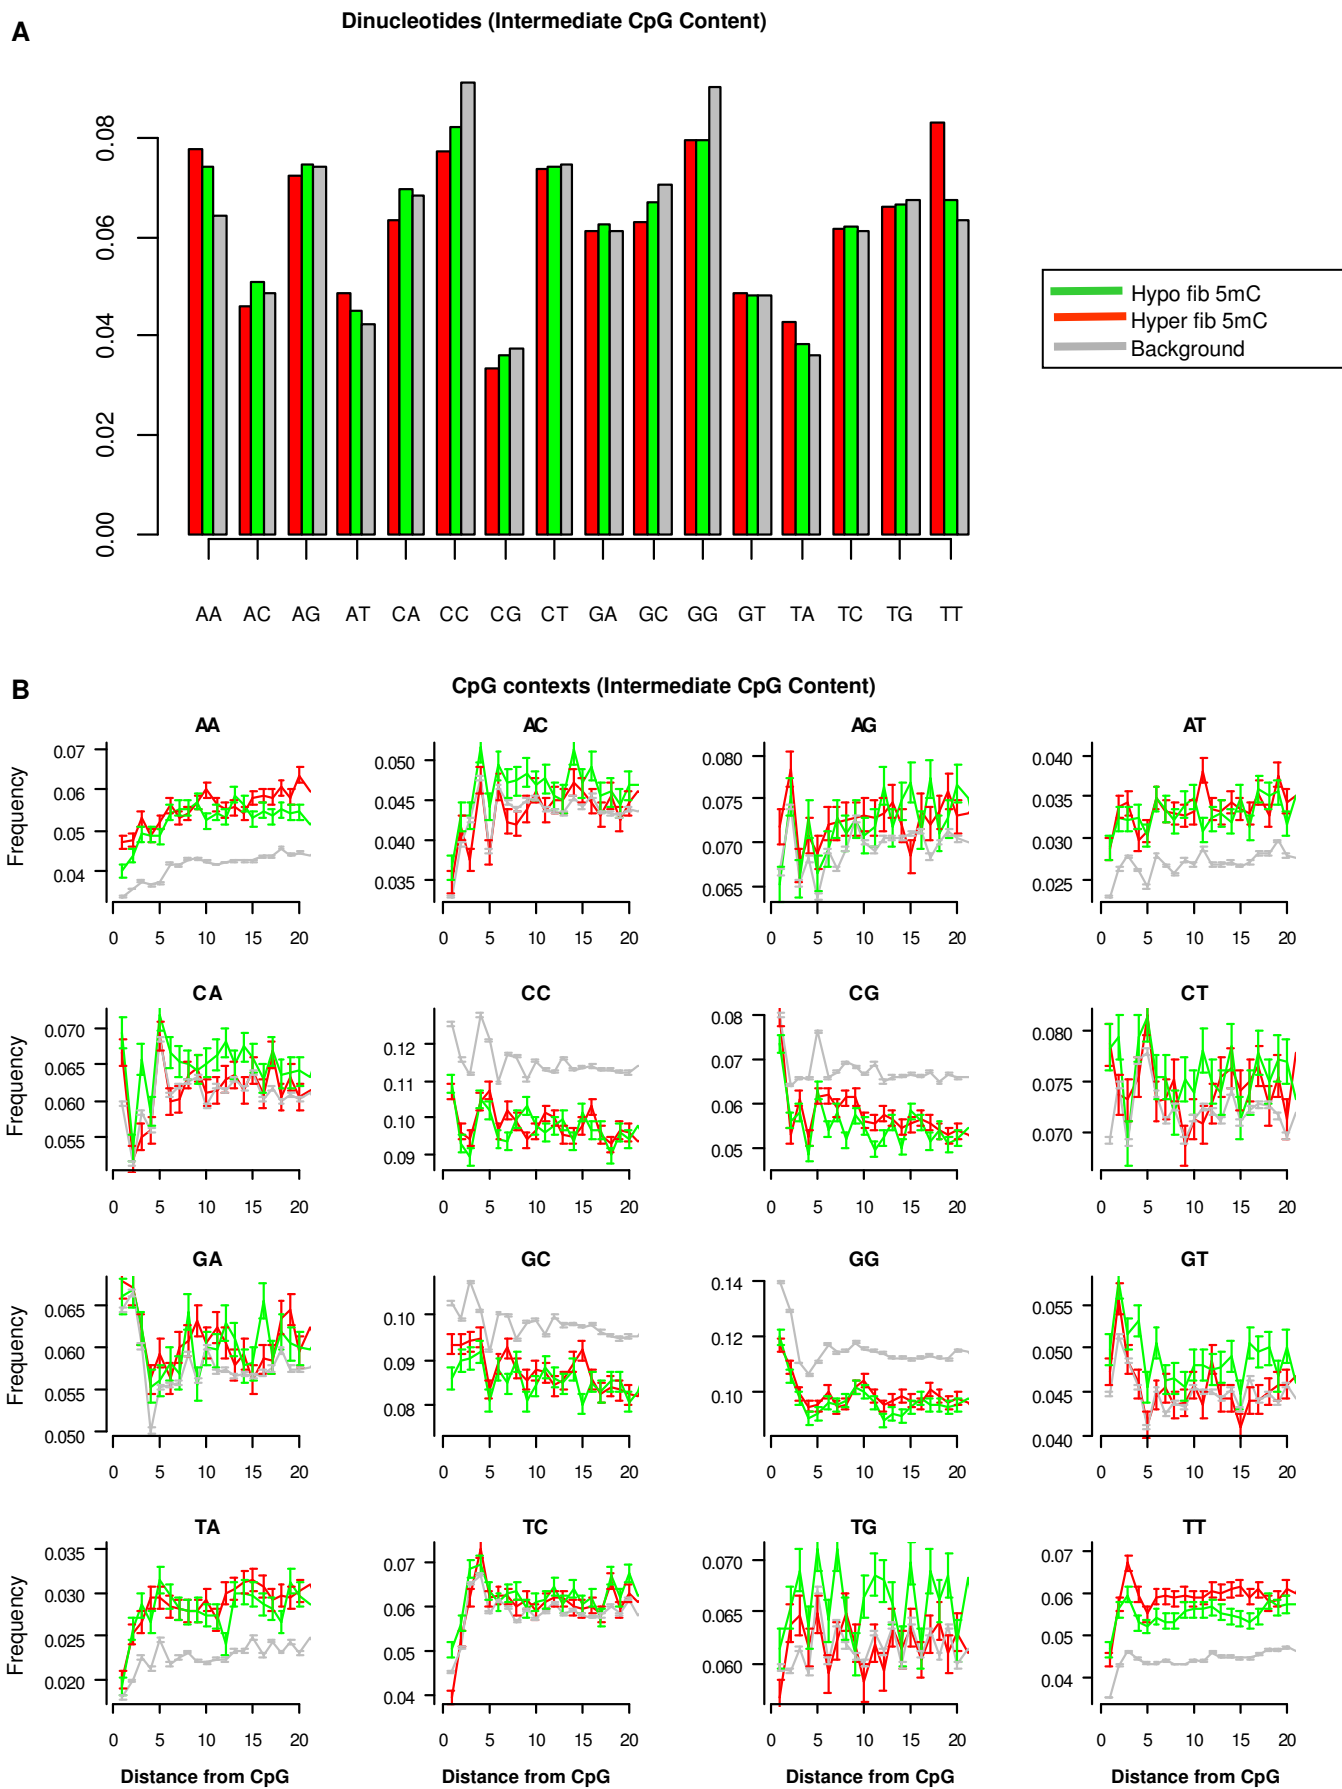

**Figure S4**

A

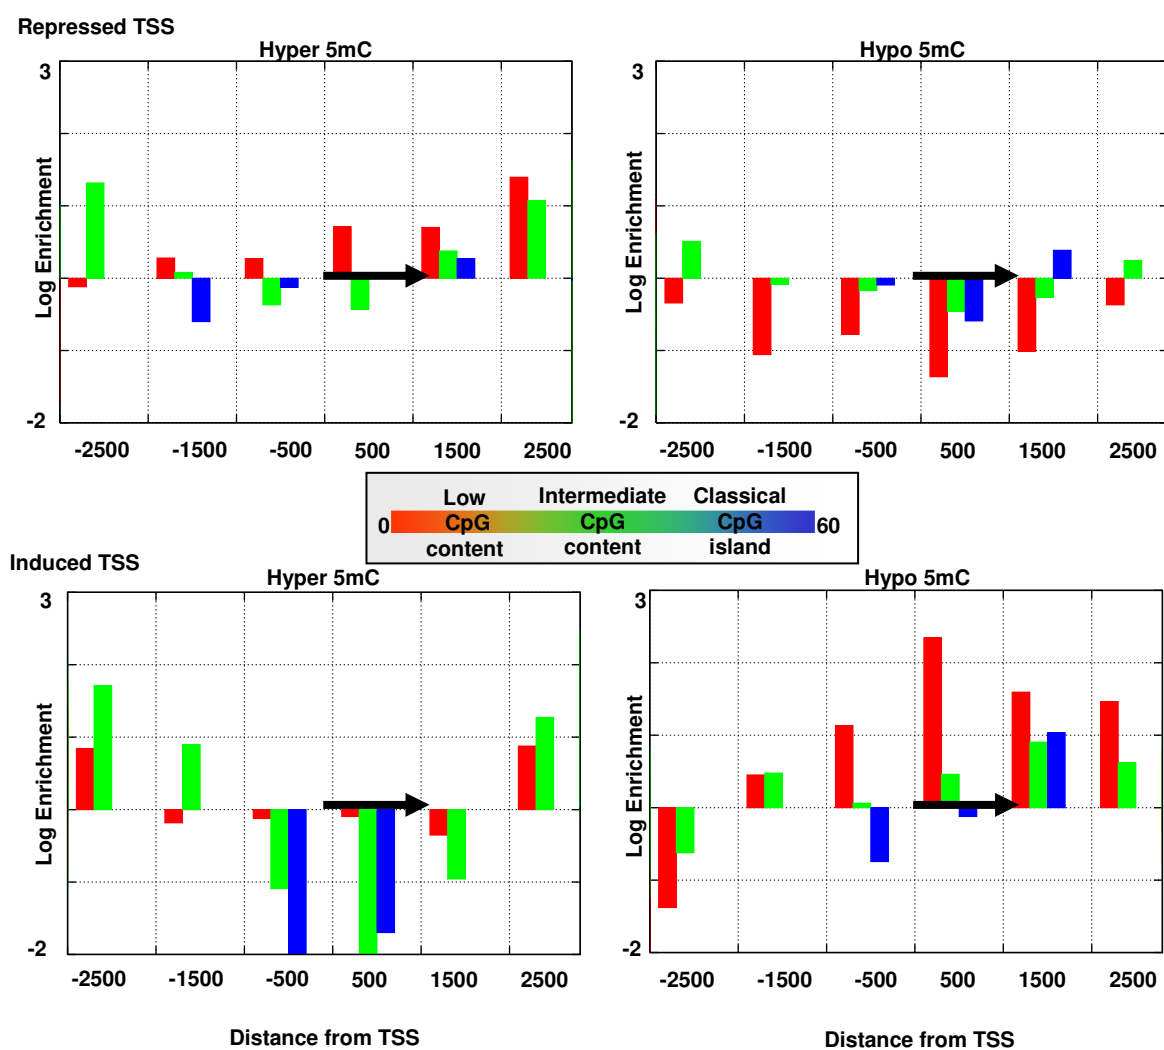

Figure S5



**A**

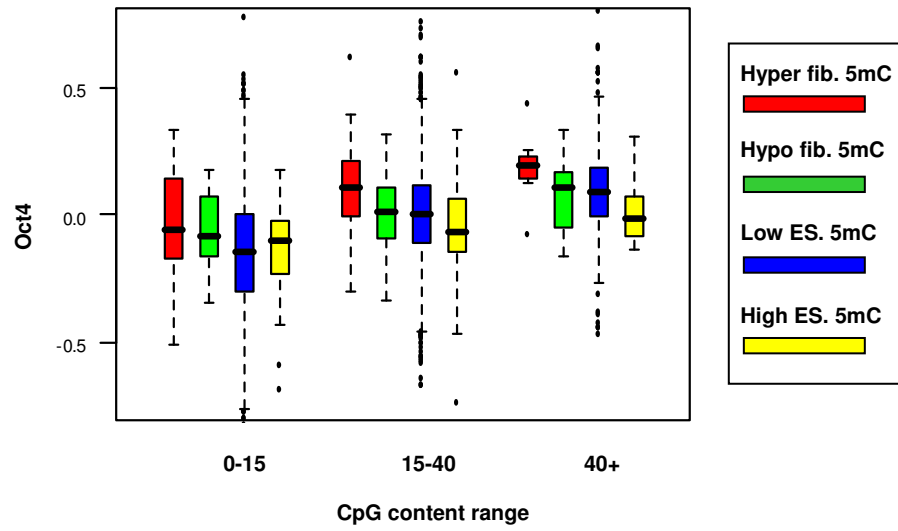

**B**

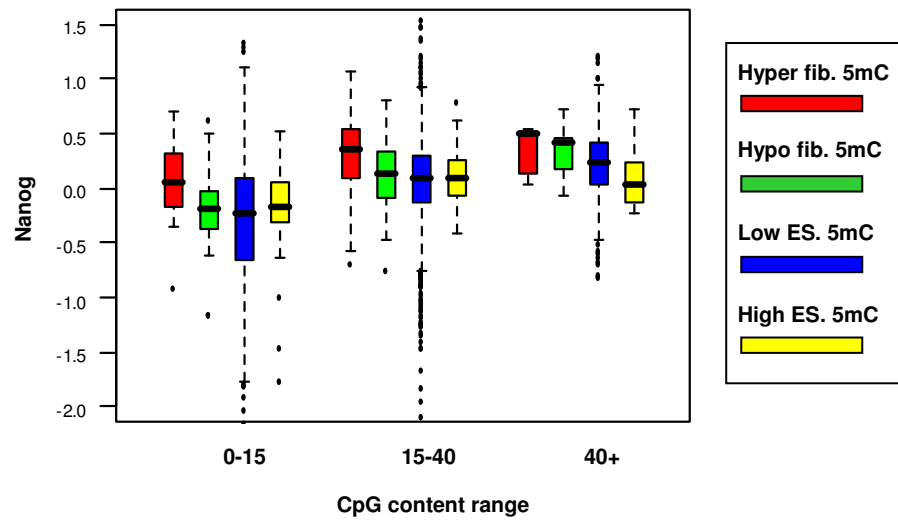

Figure S6

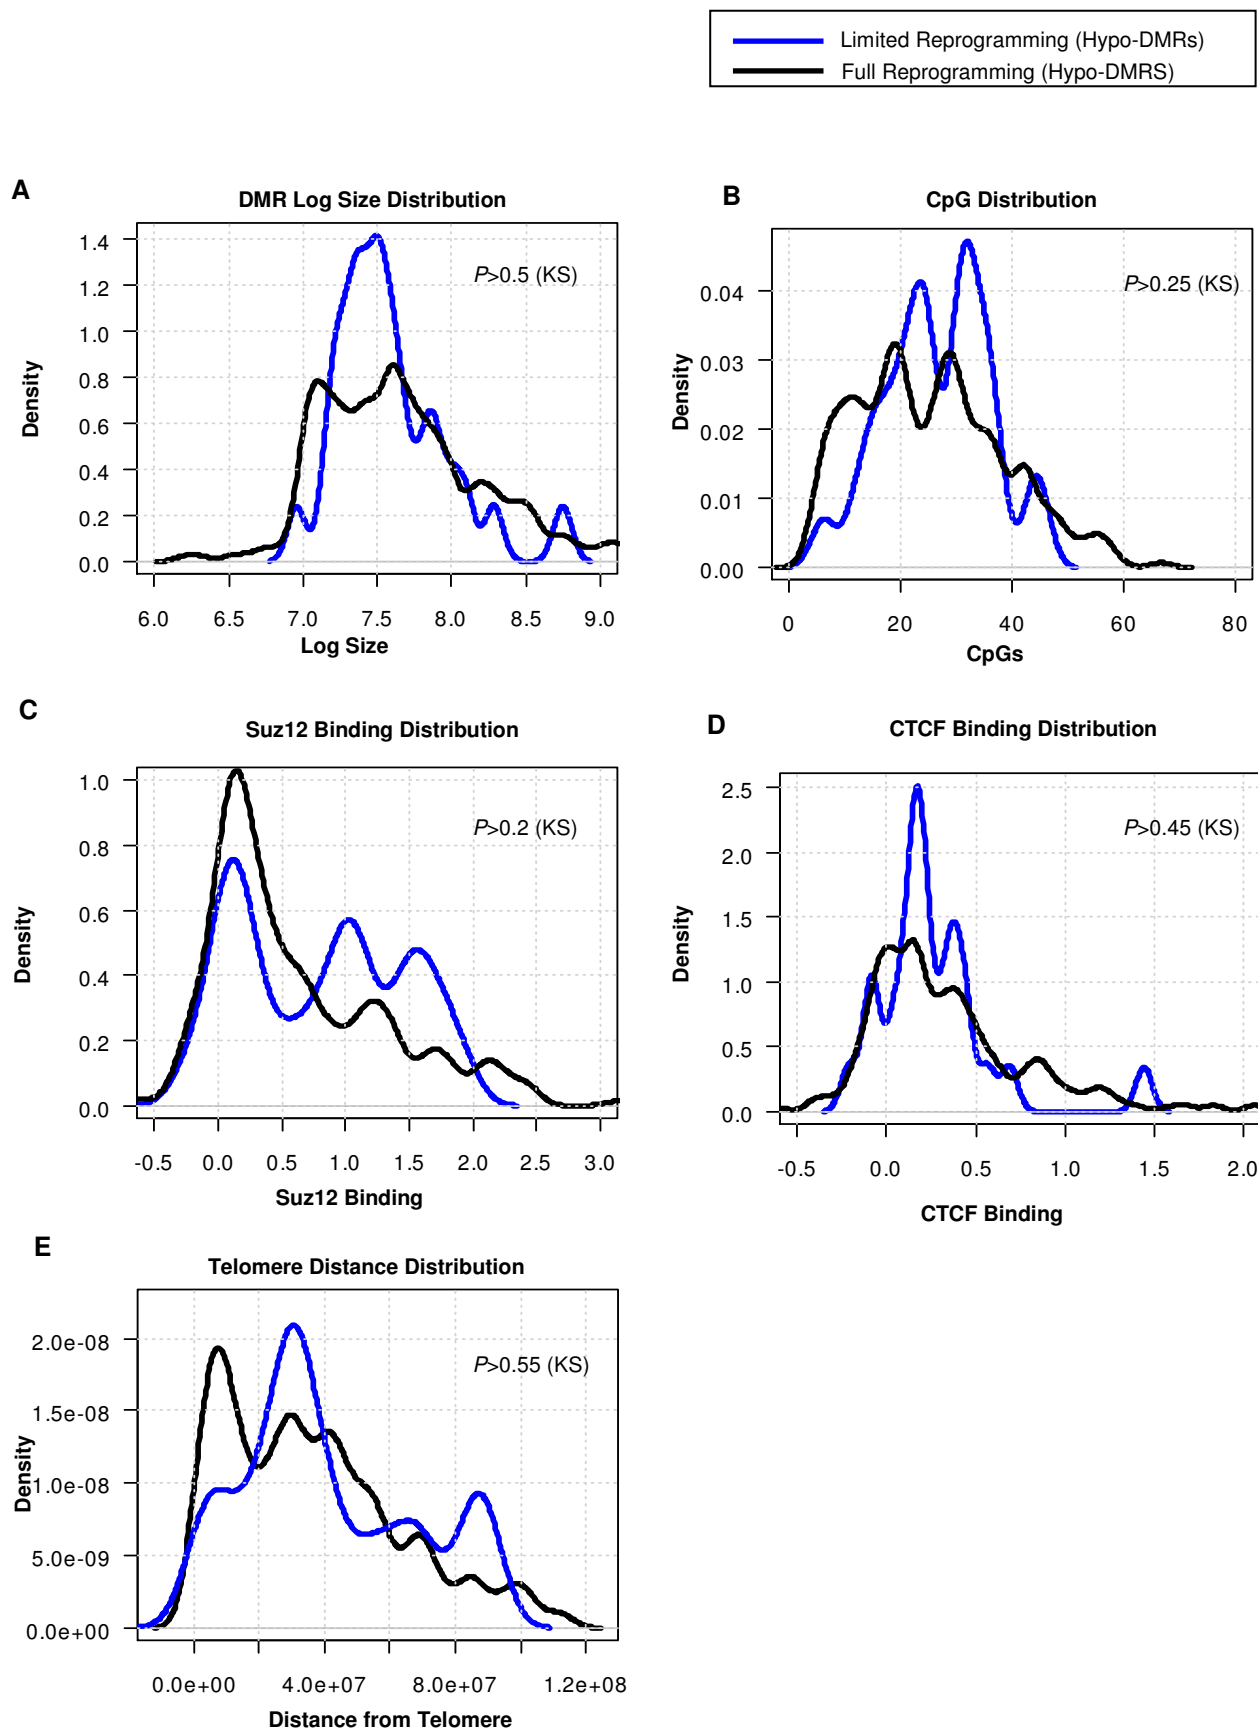

Figure S7

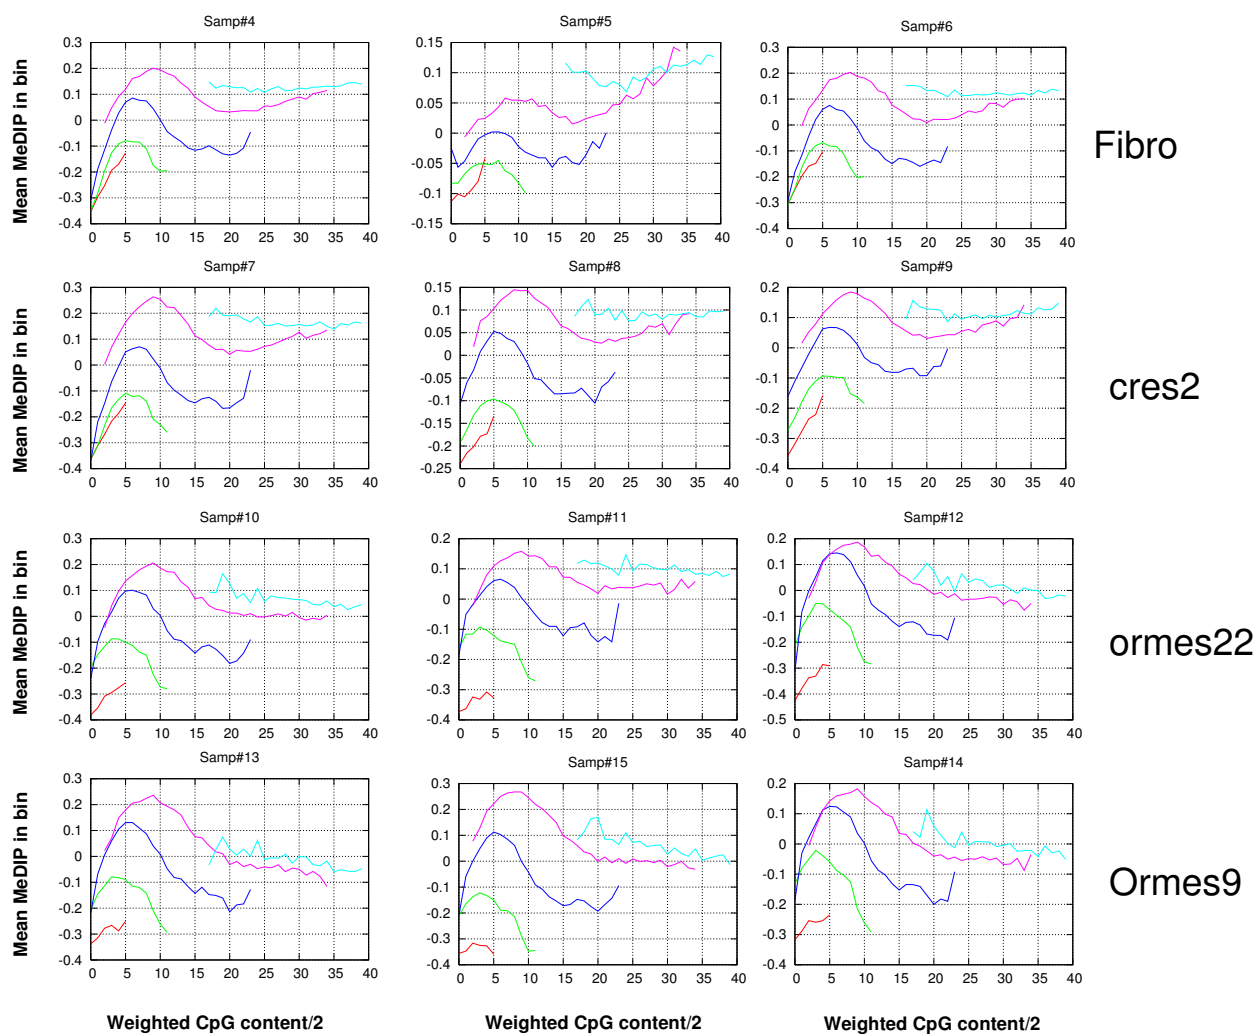

Figure S8

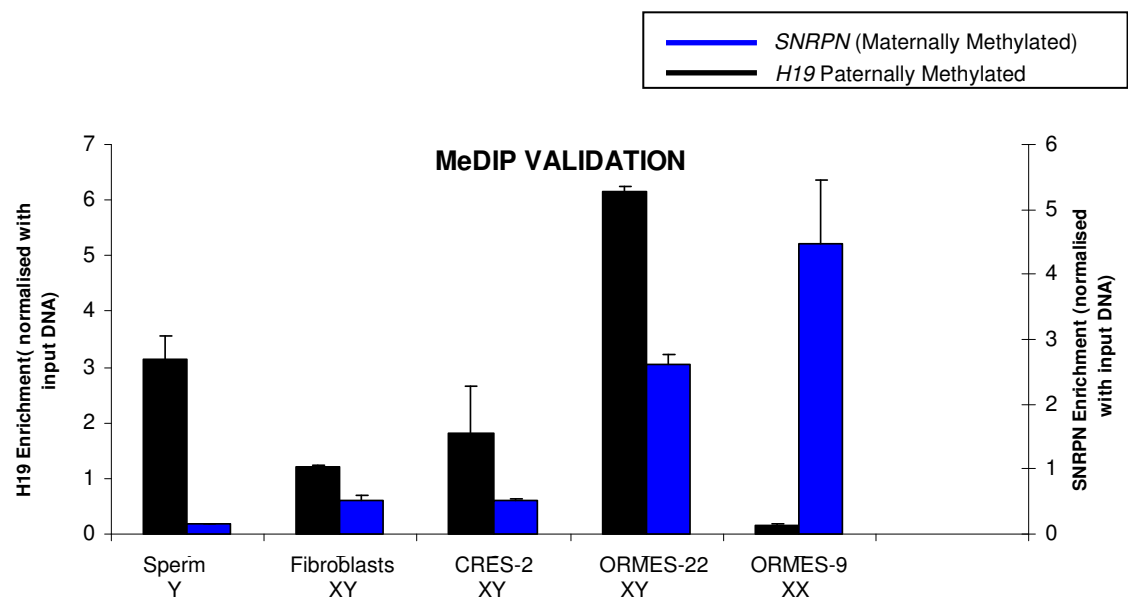

Figure S9
